# Supplementary material for: Association between maternal gestational weight gain and preterm birth according to body mass index and maternal age in Quzhou, China
Source: PubMed Central journal article supplement (PMC7522279; doi:10.1038/s41598-020-72949-w), 2020-09-28
Supplement: 41598_2020_72949_MOESM1_ESM.pdf [file 41598_2020_72949_MOESM1_ESM.pdf]

**Association between maternal gestational weight gain and preterm birth according to body mass index and maternal age in Quzhou, China**

Ying Hu<sup>1,2#</sup>, Qi Wu<sup>1#</sup>, Luyang Han<sup>1</sup>, Yuqing Zou<sup>1,2</sup>, Die Hong<sup>1</sup>, Jia Liu<sup>1</sup>, Yuying Zhu<sup>2</sup>, Qiumin Zhu<sup>2</sup>, Danqing Chen<sup>1</sup>, Lu Qi<sup>3\*</sup>, Zhaoxia Liang<sup>1,3\*</sup>

<sup>1</sup> Obstetrical Department, Women's Hospital, School of Medicine, Zhejiang University, Hangzhou, China

<sup>2</sup> Quzhou Maternal and Child Health Hospital, Quzhou Maternal and Child Medical Association, Zhejiang University

<sup>3</sup> Department of Epidemiology, School of Public Health and Tropical Medicine, Tulane University, New Orleans, LA

# Ying Hu and Qi Wu contributed equally to this work

\* Co-corresponding author

\* **Correspondence to** Zhaoxia Liang. Obstetrical Department, Women's Hospital, School of Medicine, Zhejiang University, Hangzhou, China. 310006. E-mail: xiaozazai@zju.edu.cn, Tel: +86571-87061501

**Table S1. Prevalence of preterm birth in each GWG category.**

|                                             | Low GWG |         |         |        |         | Adequate GWG |         |         |        |         | Excess GWG |        |        |        |    |  |
|---------------------------------------------|---------|---------|---------|--------|---------|--------------|---------|---------|--------|---------|------------|--------|--------|--------|----|--|
|                                             | N       | n       | n1      | n2     | n3      | N            | n       | n1      | n2     | n3      | N          | n      | n1     | n2     | n3 |  |
| <b>Overall</b>                              | 965     | 114     | 83      | 18     | 13      | 2135         | 150     | 118     | 21     | 11      | 1174       | 51     | 49     | 2      | 0  |  |
|                                             |         | (11.8%) | (8.6%)  | (1.9%) | (1.3%)  |              | (7.0%)  | (5.5%)  | (1.0%) | (0.5%)  |            | (4.3%) | (4.2%) | (0.2%) |    |  |
| <b>Age groups</b>                           |         |         |         |        |         |              |         |         |        |         |            |        |        |        |    |  |
| <20                                         | 13      | 4       | 2       | 0      | 2       | 17           | 4       | 2       | 0      | 2       | 17         | 0      | 0      | 0      | 0  |  |
|                                             |         | (30.8%) | (15.4%) |        | (15.4%) |              | (23.5%) | (11.8%) |        | (11.8%) |            |        |        |        |    |  |
| 20-29                                       | 480     | 49      | 37      | 9      | 3       | 1158         | 76      | 62      | 9      | 5       | 688        | 20     | 18     | 2      | 0  |  |
|                                             |         | (10.2%) | (7.7%)  | (1.9%) | (0.6%)  |              | (6.6%)  | (5.4%)  | (0.8%) | (0.4%)  |            | (2.9%) | (2.6%) | (0.3%) |    |  |
| 30-34                                       | 283     | 34      | 22      | 7      | 5       | 626          | 38      | 32      | 5      | 1       | 309        | 17     | 17     | 0      | 0  |  |
|                                             |         | (12.0%) | (7.8%)  | (2.5%) | (1.8%)  |              | (6.1%)  | (5.1%)  | (0.8%) | (0.2%)  |            | (5.5%) | (5.5%) |        |    |  |
| >>35                                        | 189     | 27      | 22      | 2      | 3       | 331          | 32      | 22      | 7      | 3       | 160        | 14     | 14     | 0      | 0  |  |
|                                             |         | (14.3%) | (11.6%) | (1.1%) | (1.6%)  |              | (9.7%)  | (6.6%)  | (2.1%) | (0.9%)  |            | (8.8%) | (8.8%) |        |    |  |
| <b>Educational level</b>                    |         |         |         |        |         |              |         |         |        |         |            |        |        |        |    |  |
| Primary                                     | 35      | 7       | 5       | 0      | 2       | 41           | 5       | 3       | 1      | 1       | 20         | 1      | 1      | 0      | 0  |  |
|                                             |         | (20.0%) | (14.3%) |        | (5.7%)  |              | (12.2%) | (7.3%)  | (2.4%) | (2.4%)  |            | (5.0%) | (5.0%) |        |    |  |
| Secondary                                   | 455     | 64      | 44      | 13     | 7       | 1014         | 71      | 51      | 11     | 9       | 620        | 32     | 31     | 1      | 0  |  |
|                                             |         | (14.1%) | (9.7%)  | (2.9%) | (1.5%)  |              | (7.0%)  | (5.0%)  | (1.1%) | (0.9%)  |            | (5.2%) | (5.0%) | (0.2%) |    |  |
| College                                     | 457     | 41      | 33      | 5      | 3       | 1037         | 73      | 63      | 9      | 1       | 514        | 17     | 16     | 1      | 0  |  |
|                                             |         | (9.0%)  | (7.2%)  | (1.1%) | (0.7%)  |              | (7.0%)  | (6.1%)  | (0.9%) | (0.1%)  |            | (3.3%) | (3.1%) | (0.2%) |    |  |
| Post-graduate                               | 18      | 2       | 1       | 0      | 1       | 43           | 1       | 1       | 0      | 0       | 20         | 1      | 1      | 0      | 0  |  |
|                                             |         | (11.1%) | (5.5%)  |        | (5.5%)  |              | (2.3%)  | (2.3%)  |        |         |            | (5.0%) | (5.0%) |        |    |  |
| <b>Gravidity (before current pregnancy)</b> |         |         |         |        |         |              |         |         |        |         |            |        |        |        |    |  |
| 0                                           | 263     | 26      | 22      | 2      | 2       | 595          | 47      | 38      | 7      | 2       | 350        | 8      | 6      | 2      | 0  |  |
|                                             |         | (9.9%)  | (8.4%)  | (0.8%) | (0.8%)  |              | (7.9%)  | (6.4%)  | (1.2%) | (0.3%)  |            | (2.3%) | (1.7%) | (0.6%) |    |  |
| 1-2                                         | 481     | 59      | 38      | 13     | 8       | 1012         | 63      | 46      | 10     | 7       | 561        | 20     | 20     | 0      | 0  |  |
|                                             |         | (12.3%) | (7.9%)  | (2.7%) | (1.7%)  |              | (6.2%)  | (4.5%)  | (1.0%) | (0.7%)  |            | (3.6%) | (3.6%) |        |    |  |
| >>3                                         | 221     | 29      | 23      | 3      | 3       | 528          | 40      | 34      | 4      | 2       | 263        | 23     | 23     | 0      | 0  |  |
|                                             |         | (13.1%) | (10.4%) | (1.4%) | (1.4%)  |              | (7.6%)  | (6.4%)  | (0.8%) | (0.4%)  |            | (8.7%) | (8.7%) |        |    |  |
| <b>Parity (before current pregnancy)</b>    |         |         |         |        |         |              |         |         |        |         |            |        |        |        |    |  |
| Nullipara                                   | 409     | 50      | 36      | 8      | 6       | 1034         | 78      | 64      | 10     | 4       | 646        | 14     | 12     | 2      | 0  |  |
|                                             |         | (12.2%) | (8.8%)  | (2.0%) | (1.5%)  |              | (7.5%)  | (6.2%)  | (1.0%) | (0.4%)  |            | (2.2%) | (1.9%) | (0.3%) |    |  |
| Multipara                                   | 556     | 64      | 47      | 10     | 7       | 1101         | 72      | 54      | 11     | 7       | 528        | 37     | 37     | 0      | 0  |  |
|                                             |         | (11.5%) | (8.5%)  | (1.8%) | (1.3%)  |              | (6.5%)  | (4.9%)  | (1.0%) | (0.6%)  |            | (7.0%) | (7.0%) |        |    |  |
| <b>Pre-pregnancy BMI(kg/m<sup>2</sup>)</b>  |         |         |         |        |         |              |         |         |        |         |            |        |        |        |    |  |

|                                              | Number | 1st     | 2nd     | 3rd     | 4th    | Total | 1st     | 2nd     | 3rd    | 4th    | Total | 1st     | 2nd     | 3rd    | 4th |  |
|----------------------------------------------|--------|---------|---------|---------|--------|-------|---------|---------|--------|--------|-------|---------|---------|--------|-----|--|
| <b>Underweight</b>                           | 190    | 15      | 10      | 3       | 2      | 371   | 14      | 12      | 1      | 1      | 134   | 6       | 6       | 0      | 0   |  |
|                                              |        | (7.9%)  | (5.3%)  | (1.6%)  | (1.1%) |       | (3.8%)  | (3.2%)  | (0.3%) | (0.3%) |       | (4.5%)  | (4.5%)  |        |     |  |
| <b>Normal</b>                                | 739    | 93      | 67      | 15      | 11     | 1609  | 117     | 96      | 15     | 6      | 785   | 28      | 28      | 0      | 0   |  |
|                                              |        | (12.6%) | (9.1%)  | (2.0%)  | (1.5%) |       | (7.3%)  | (6.0%)  | (0.9%) | (0.4%) |       | (3.6%)  | (3.6%)  |        |     |  |
| <b>Overweight and Obese</b>                  | 36     | 6       | 6       | 0       | 0      | 155   | 19      | 10      | 5      | 4      | 255   | 17      | 15      | 2      | 0   |  |
|                                              |        | (16.7%) | (16.7%) |         |        |       | (12.3%) | (6.5%)  | (3.2%) | (2.6%) |       | (6.7%)  | (5.9%)  | (0.8%) |     |  |
| <b>Previous history of preterm birth</b>     |        |         |         |         |        |       |         |         |        |        |       |         |         |        |     |  |
| <b>Yes</b>                                   | 34     | 8       | 5       | 1       | 2      | 59    | 12      | 8       | 2      | 2      | 26    | 8       | 8       | 0      | 0   |  |
|                                              |        | (23.5%) | (14.7%) | (2.9%)  | (5.9%) |       | (20.3%) | (13.6%) | (3.4%) | (3.4%) |       | (30.8%) | (30.8%) |        |     |  |
| <b>No</b>                                    | 522    | 56      | 42      | 9       | 5      | 1042  | 60      | 46      | 9      | 5      | 502   | 29      | 29      | 0      | 0   |  |
|                                              |        | (10.7%) | (8.0%)  | (1.7%)  | (1.0%) |       | (5.8%)  | (4.4%)  | (0.9%) | (0.5%) |       | (5.8%)  | (5.8%)  |        |     |  |
| <b>Nullipara</b>                             | 409    | 50      | 36      | 8       | 6      | 1034  | 78      | 64      | 10     | 4      | 646   | 14      | 12      | 2      | 0   |  |
|                                              |        | (12.2%) | (8.8%)  | (2.0%)  | (1.5%) |       | (7.5%)  | (6.2%)  | (1.0%) | (0.4%) |       | (2.2%)  | (1.9%)  | (0.3%) |     |  |
| <b>Mode of conception</b>                    |        |         |         |         |        |       |         |         |        |        |       |         |         |        |     |  |
| <b>Nature</b>                                | 946    | 112     | 82      | 18      | 12     | 2079  | 141     | 112     | 19     | 10     | 1136  | 48      | 46      | 2      | 0   |  |
|                                              |        | (11.8%) | (8.7%)  | (1.9%)  | (1.3%) |       | (6.8%)  | (5.4%)  | (0.9%) | (0.5%) |       | (4.2%)  | (4.0%)  | (0.2%) |     |  |
| <b>ART</b>                                   | 19     | 2       | 1       | 0       | 1      | 56    | 9       | 6       | 2      | 1      | 38    | 3       | 3       | 0      | 0   |  |
|                                              |        | (10.5%) | (5.3%)  |         | (5.3%) |       | (16.1%) | (10.7%) | (3.6%) | (1.8%) |       | (7.9%)  | (7.9%)  |        |     |  |
| <b>Prenatal care</b>                         |        |         |         |         |        |       |         |         |        |        |       |         |         |        |     |  |
| <b>none</b>                                  | 10     | 1       | 0       | 1       | 0      | 11    | 3       | 1       | 0      | 1      | 4     | 0       | 0       | 0      | 0   |  |
|                                              |        | (10.0%) |         | (10.0%) |        |       | (27.2%) | (9.1%)  |        | (9.1%) |       |         |         |        |     |  |
| <b>Our hospital</b>                          | 690    | 66      | 54      | 5       | 7      | 1599  | 93      | 79      | 10     | 4      | 896   | 40      | 39      | 1      | 0   |  |
|                                              |        | (9.6%)  | (7.8%)  | (0.7%)  | (1.0%) |       | (5.8%)  | (4.9%)  | (0.6%) | (0.3%) |       | (4.5%)  | (4.4%)  | (0.1%) |     |  |
| <b>Other hospitals</b>                       | 265    | 47      | 29      | 12      | 6      | 525   | 54      | 37      | 11     | 6      | 274   | 11      | 10      | 1      | 0   |  |
|                                              |        | (17.7%) | (10.9%) | (4.5%)  | (2.3%) |       | (10.3%) | (7.0%)  | (2.1%) | (1.1%) |       | (4.0%)  | (3.6%)  | (0.4%) |     |  |
| <b>Timing of initiation of prenatal care</b> |        |         |         |         |        |       |         |         |        |        |       |         |         |        |     |  |
| <b>1st-3rd month</b>                         | 861    | 102     | 74      | 16      | 12     | 1927  | 130     | 103     | 19     | 8      | 1045  | 47      | 45      | 2      | 0   |  |
|                                              |        | (11.8%) | (8.6%)  | (1.9%)  | (1.4%) |       | (6.7%)  | (5.3%)  | (1.0%) | (0.4%) |       | (4.5%)  | (4.3%)  | (0.2%) |     |  |
| <b>4th-6th month</b>                         | 88     | 11      | 9       | 1       | 1      | 185   | 16      | 12      | 2      | 2      | 120   | 3       | 3       | 0      | 0   |  |
|                                              |        | (12.5%) | (10.2%) | (1.1%)  | (1.1%) |       | (8.6%)  | (6.5%)  | (1.1%) | (1.1%) |       | (2.5%)  | (2.5%)  |        |     |  |
| <b>7th to final month</b>                    | 6      | 0       | 0       | 0       | 0      | 12    | 1       | 1       | 0      | 0      | 5     | 1       | 1       | 0      | 0   |  |
|                                              |        |         |         |         |        |       | (8.3%)  | (8.3%)  |        |        |       | (20.0%) | (20.0%) |        |     |  |
| <b>none</b>                                  | 10     | 1       | 0       | 1       | 0      | 11    | 3       | 2       | 0      | 1      | 4     | 0       | 0       | 0      | 0   |  |
|                                              |        | (10.0%) |         | (10.0%) |        |       | (27.2%) | (9.1%)  |        | (9.1%) |       |         |         |        |     |  |
| <b>Pregnancy-induced hypertension</b>        |        |         |         |         |        |       |         |         |        |        |       |         |         |        |     |  |
|                                              | 17     | 5       | 3       | 1       | 1      | 58    | 11      | 8       | 3      | 0      | 51    | 6       | 5       | 1      | 0   |  |
|                                              |        | (29.4%) | (17.6%) | (5.9%)  | (5.9%) |       | (19.0%) | (13.8%) | (5.2%) |        |       | (11.8%) | (9.8%)  | (2.0%) |     |  |

|                                      |     |         |        |         |         |      |        |        |        |        |     |        |        |        |   |
|--------------------------------------|-----|---------|--------|---------|---------|------|--------|--------|--------|--------|-----|--------|--------|--------|---|
| <b>Gestational diabetes mellitus</b> | 265 | 25      | 17     | 4       | 4       | 428  | 32     | 24     | 7      | 1      | 229 | 13     | 12     | 1      | 0 |
|                                      |     | (9.4%)  | (6.4%) | (16.0%) | (16.0%) |      | (7.5%) | (5.6%) | (1.6%) | (0.2%) |     | (5.7%) | (5.2%) | (0.4%) |   |
| <b>Infant Sex</b>                    |     |         |        |         |         |      |        |        |        |        |     |        |        |        |   |
| <b>Male</b>                          | 481 | 60      | 43     | 11      | 6       | 1140 | 96     | 74     | 14     | 8      | 599 | 29     | 28     | 1      | 0 |
|                                      |     | (12.5%) | (8.9%) | (2.3%)  | (1.2%)  |      | (8.4%) | (6.5%) | (1.2%) | (0.7%) |     | (4.8%) | (4.7%) | (0.1%) |   |
| <b>Female</b>                        | 484 | 54      | 40     | 7       | 7       | 995  | 54     | 44     | 7      | 3      | 575 | 22     | 21     | 1      | 0 |
|                                      |     | (11.2%) | (8.3%) | (1.4%)  | (1.4%)  |      | (5.4%) | (4.4%) | (0.7%) | (0.3%) |     | (3.8%) | (3.7%) | (0.1%) |   |

Data were n/N (%). N means total births records; n means preterm births records; n1 means moderately preterm births records; n2 means very preterm births records; n3 means extremely preterm births records.
